# Supplementary material for: Negative regulatory roles of DE-ETIOLATED1 in flowering time in Arabidopsis
Source: PubMed Central journal article supplement (PMC4428065; doi:10.1038/srep09728), 2015-05-12
Supplement: srep09728-s1.pdf [file srep09728-s1.pdf]

# Supplementary Information

## Negative regulatory roles of *DE-ETIOLATED1* in flowering time in *Arabidopsis*

Min-Young Kang, Soo-Cheul Yoo, Hye-Young Kwon, Byoung-Doo Lee, Jung-Nam Cho, Yoo-Sun Noh & Nam-Chon Paek

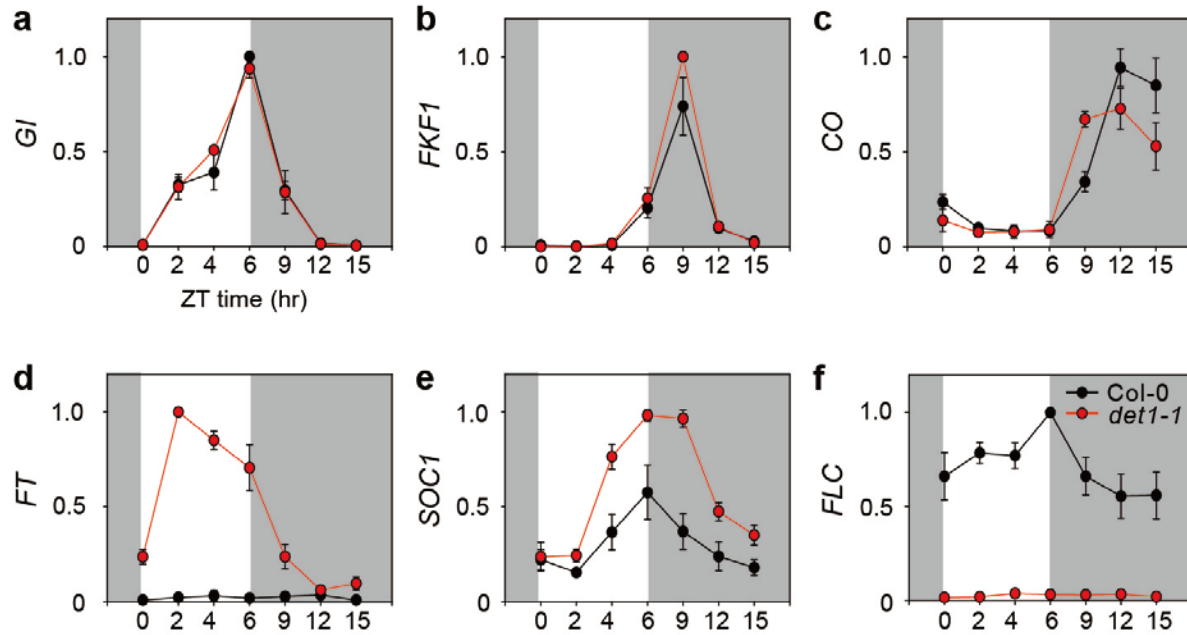

**Figure S1 | Effect of *det1-1* mutation on *GI*, *FKF1*, *CO*, *FT*, *SOC1*, and *FLC* expression under 18T (6-h light:12-h dark).** (a-f) The expression of *GI* (a), *FKF1* (b), *CO* (c), *FT* (d), *SOC1* (e), and *FLC* (f) genes was analyzed in Col-0 and *det1-1* mutants by real-time PCR using 10-day-old plants. Plants were grown at 22°C under SD (6-h light:12-h dark) conditions, and plant tissues were harvested every 2 h during daytime and every 3 h during nighttime. *ACT2* expression was used for normalization. Means and standard deviations were obtained from three biological replicates.

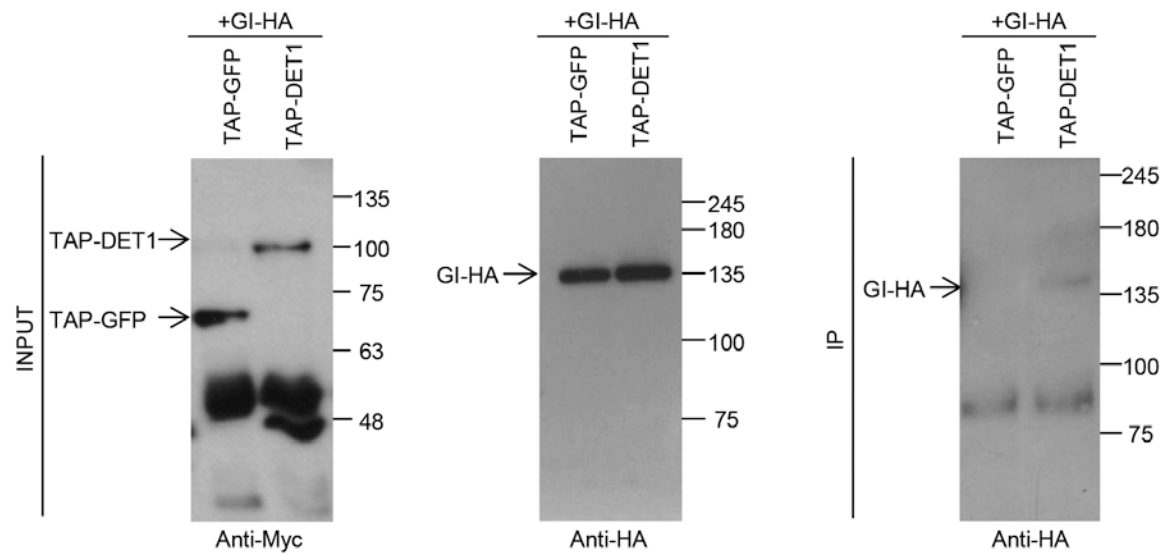

**Figure S2 | DET1 directly interacts with GI.** Uncropped immunoblot images of Fig. 4c.

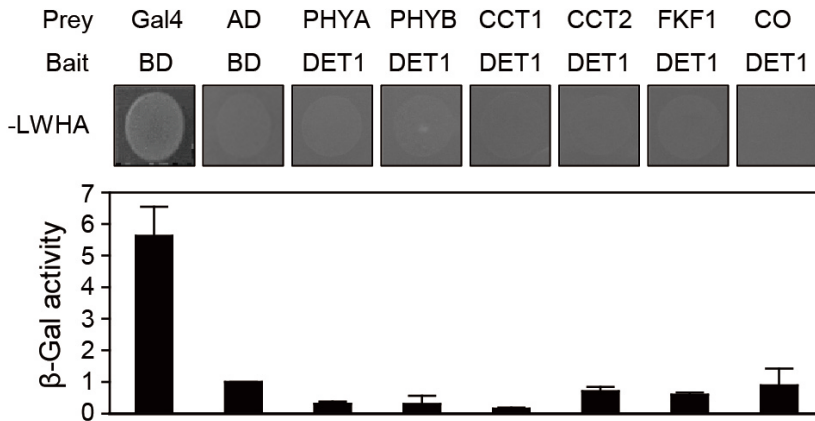

**Figure S3 | DET1 does not interact with circadian clock-related proteins in a yeast-2-hybrid assay.** DET1 does not interact with PHYA, PHYB, CCT1, CCT2, CO, and FKF1 in yeast-2-hybrid assays. DET1 was used as bait in the pGBK vector. For preys, PHYA, PHYB, CCT1, CCT2, CO, and FKF1 were used. Gal4 indicates a positive control. Empty pGBKT7 (BD) and pGADT7 (AD) vectors were a negative control. SD medium (-LWHA; lacking medium of tryptophan, leucine, histidine, and adenine) was used for selection of the interaction between bait and prey proteins.  $\beta$ -Galactosidase ( $\beta$ -Gal) activity assays were performed according to the manufacturer's protocol. Means and standard deviations were obtained from three biological replicates. This experiment was replicated at least three times with similar results.

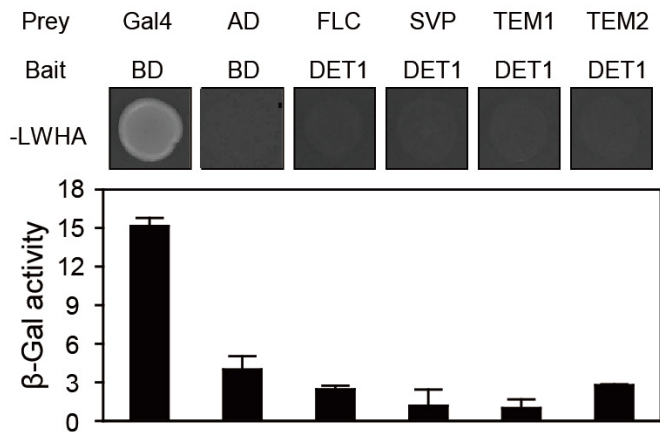

**Figure S4 | DET1 does not interact with repressors of *FT* in a yeast-2-hybrid assay.** DET1 does not interact with FLC, SVP, TEM1, and TEM2 in yeast-2-hybrid assays. DET1 was used as bait in pGBK vector. For preys, FLC, SVP, TEM1, and TEM2 were used. Gal4 indicates a positive control. Empty pGBKT7 (BD) and pGADT7 (AD) vectors were a negative control. SD medium (-LWHA; lacking medium of tryptophan, leucine, histidine, and adenine) was used for selection of the interaction between bait and prey proteins.  $\beta$ -Galactosidase ( $\beta$ -Gal) activity assays were performed according to the manufacturer's protocol. Means and standard deviations were obtained from three biological replicates.

**Table S1. Effect of *det1* mutation on flowering time in different mutant backgrounds.**

| Genotype             | Rosette leaves at bolting |              |
|----------------------|---------------------------|--------------|
|                      | LD (16L:8D)               | SD (10L:14D) |
| Wild type (Col-0)    | 12.1 ± 0.9                | 37.7 ± 3.3   |
| <i>det1-1</i>        | 9.0 ± 1.3                 | 12.9 ± 2.2   |
| <i>cry2-1</i>        | 19.4 ± 2.4                | 42.1 ± 7.8   |
| <i>cry2-1 det1-1</i> | 11.4 ± 0.9                | 17.9 ± 3.5   |
| <i>gi-1</i>          | 35.5 ± 1.8                | 52.2 ± 4.0   |
| <i>gi-1 det1-1</i>   | 29.9 ± 1.7                | 40.3 ± 4.4   |
| <i>fkf1-t</i>        | 20.1 ± 1.0                | 43.0 ± 4.4   |
| <i>fkf1-t det1-1</i> | 12.6 ± 1.1                | 24.3 ± 2.2   |
| <i>co-101</i>        | 31.8 ± 2.2                | 48.8 ± 3.6   |
| <i>co-101 det1-1</i> | 21.8 ± 1.6                | 25.6 ± 4.9   |
| <i>ft-1</i>          | 31.7 ± 1.2                | 51.7 ± 4.3   |
| <i>ft-1 det1-1</i>   | 29.0 ± 1.5                | 40.3 ± 3.0   |
| <i>soc1-2</i>        | 18.2 ± 1.1                | 56.2 ± 2.9   |
| <i>soc1-2 det1-1</i> | 14.0 ± 2.1                | 27.0 ± 2.6   |

  

| Genotype                  | Rosette leaves at bolting |             |
|---------------------------|---------------------------|-------------|
|                           | LD (16L:8D)               | SD (8L:16D) |
| Wild type(Col-0)          | 11.8 ± 0.8                | 44.9 ± 3.7  |
| <i>det1-1</i>             | 10.4 ± 0.5                | 16.8 ± 1.0  |
| <i>ft-1</i>               | 40.8 ± 3.8                | 69.0 ± 3.9  |
| <i>soc1-2</i>             | 20.6 ± 1.5                | 63.1 ± 2.9  |
| <i>ft-1 soc1-2</i>        | 48.4 ± 4.5                | 79.8 ± 5.3  |
| <i>ft-1 soc1-2 det1-1</i> | 52.4 ± 3.6                | 85.9 ± 6.6  |

**Table S2. Primer sequences used in this study.**

| Construct                  | Primer    | Sequence (5' → 3')         |
|----------------------------|-----------|----------------------------|
| <b>Real-time PCR</b>       |           |                            |
| <i>ACT2</i>                | ACT_F     | TGGGATGAACCAGAAGGATG       |
|                            | ACT_R     | AAGAATACCTCTCTTGGATTGTGC   |
| <i>CO</i>                  | CO_F      | GCCTACTTGTGCATGAGCTG       |
|                            | CO_R      | GTTTATGGCGGGAAGCAAC        |
| <i>FT</i>                  | FT_F      | GGTGGAGAAGACCTCAGGAA       |
|                            | FT_R      | GGTTGCTAGGACTTGGAACATC     |
| <i>FKF1</i>                | FKF1_F    | GTTGTACCGCCTCCAAGACT       |
|                            | FKF1_R    | AGATGATGACCCTACCACACG      |
| <i>GI</i>                  | GI_F      | TGCATCTGGTGTAAGGCTACC      |
|                            | GI_R      | CCTATAGCCCGCAAGAAGTG       |
| <i>SOC1</i>                | SOC1_F    | AACAACCTCGAAGCTTCTAAACGTAA |
|                            | SOC1_R    | CCTCGATTGAGCATGTTCT        |
| <i>FLC</i>                 | FLC_F     | GCTACTTGAACCTTGTGGATAGCAA  |
|                            | FLC_R     | GGAGAGGGCAGTCTCAAGGT       |
| <b><i>FT</i> promoters</b> |           |                            |
| I region                   | pFT_I_F   | CTGCGACTGCGACCTATTTT       |
|                            | pFT_I_R   | GCCACTGTTCTACACGTCCA       |
| II region                  | pFT_II_F  | ACTTGGCGGTACCCTACTT        |
|                            | pFT_II_R  | ATATCTCCCACTTGGTAG         |
| III region                 | pFT_III_F | GTCGAGAGAGGTATCTTGTTAAAG   |
|                            | pFT_III_R | ATCATAGGCATGAACCCTCTACAC   |
| IV region                  | pFT_IV_F  | TATGTGTAGAGGGTTCATGCCTATG  |
|                            | pFT_IV_R  | TGGCCATAACCTTTAGAGTG       |
| V region                   | pFT_V_F   | CCAAGAGTTGAGATTGGTGGA      |

|                             |            |                               |
|-----------------------------|------------|-------------------------------|
|                             | pFT_V_R    | CCAAGAGTTGAGATTGGTGGA         |
| VI region                   | pFT_VI_F   | TCCACCAACTTCTTGCATAA          |
|                             | pFT_VI_R   | CCACAACAGAAATTCATCAA          |
| <i>UBI10</i>                | UBI10_F    | TTGCCAATTTTCAGCTCCAC          |
|                             | UBI10_R    | TGACTCGTCGACAACCACAA          |
| <br>                        |            |                               |
| <b><i>FLC promoters</i></b> |            |                               |
| I region                    | pFLC_I_F   | TGTCCACACATATGGCAATAGCTCAA    |
|                             | pFLC_I_R   | CAAGCTGATACAAGCATTTACCAA      |
| II region                   | pFLC_II_F  | CCTAATTTGATCCTCAGGTTTGGG      |
|                             | pFLC_II_R  | CCGACGAAGAAAAAGTAGATAGGCAC    |
| III region                  | pFLC_III_F | GTCATTCACGATTTGTTTGATACGATCTG |
|                             | pFLC_III_R | GATCTCCCGTAAGTGCATTGCA        |
| <i>FUS3</i>                 | FUS3_F     | ATGTGGCACGTGGGAAATAG          |
|                             | FUS3_R     | GTGGCAAGTGTTGATCATGG          |

---
